# Supplementary material for: Dehydration triggers ecdysone-mediated recognition-protein priming and elevated anti-bacterial immune responses in Drosophila Malpighian tubule renal cells
Source: PubMed Central journal article supplement (PMC5984326; doi:10.1186/s12915-018-0532-5), 2018-05-31
Supplement: 12915_2018_532_MOESM3_ESM.pdf [file 12915_2018_532_MOESM3_ESM.pdf]

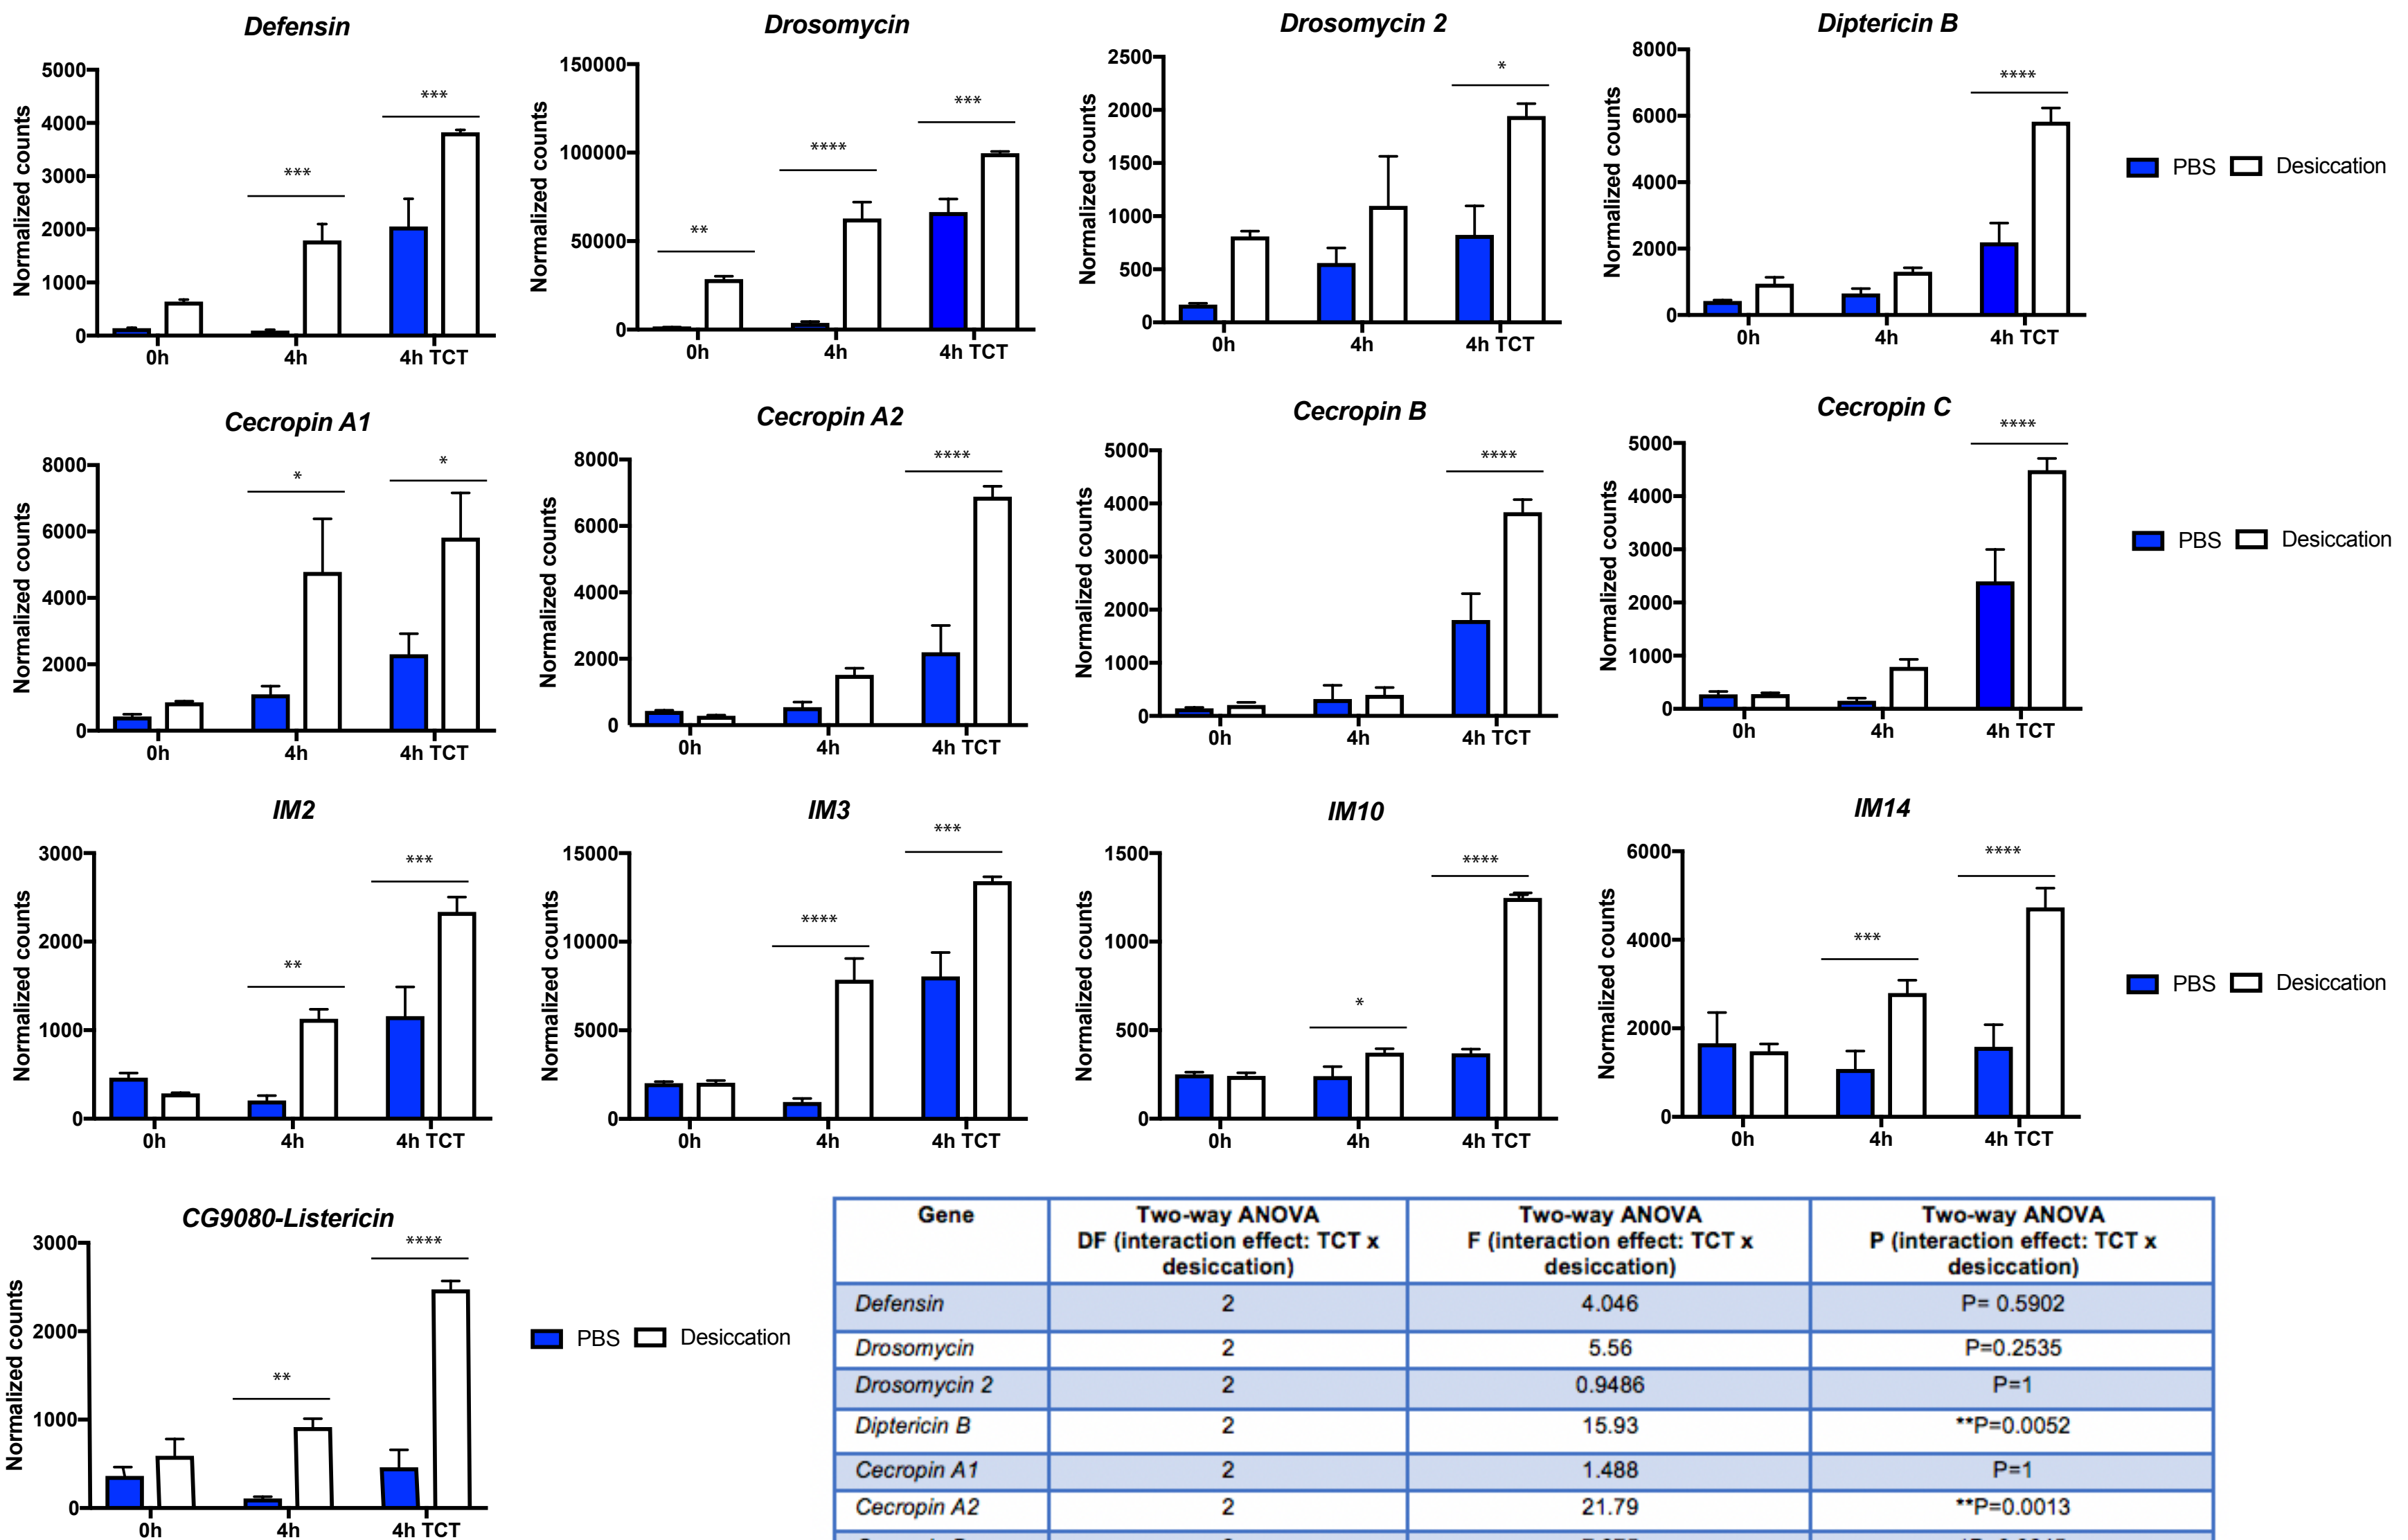

| Gene                     | Two-way ANOVA<br>DF (interaction effect: TCT x<br>desiccation) | Two-way ANOVA<br>F (interaction effect: TCT x<br>desiccation) | Two-way ANOVA<br>P (interaction effect: TCT x<br>desiccation) |
|--------------------------|----------------------------------------------------------------|---------------------------------------------------------------|---------------------------------------------------------------|
| <i>Defensin</i>          | 2                                                              | 4.046                                                         | P= 0.5902                                                     |
| <i>Drosomycin</i>        | 2                                                              | 5.56                                                          | P=0.2535                                                      |
| <i>Drosomycin 2</i>      | 2                                                              | 0.9486                                                        | P=1                                                           |
| <i>Diptericin B</i>      | 2                                                              | 15.93                                                         | **P=0.0052                                                    |
| <i>Cecropin A1</i>       | 2                                                              | 1.488                                                         | P=1                                                           |
| <i>Cecropin A2</i>       | 2                                                              | 21.79                                                         | **P=0.0013                                                    |
| <i>Cecropin B</i>        | 2                                                              | 7.875                                                         | *P=0.0845                                                     |
| <i>Cecropin C</i>        | 2                                                              | 7.564                                                         | *P=0.0975                                                     |
| <i>IM2</i>               | 2                                                              | 11.33                                                         | *P=0.0221                                                     |
| <i>IM3</i>               | 2                                                              | 14.37                                                         | **P=0.0091                                                    |
| <i>IM10</i>              | 2                                                              | 139.2                                                         | **P=0.0013                                                    |
| <i>IM14</i>              | 2                                                              | 24.87                                                         | **P=0.0013                                                    |
| <i>CG9080-Listericin</i> | 2                                                              | 19.52                                                         | **P=0.0026                                                    |

Figure S3
