# Supplementary material for: Dehydration triggers ecdysone-mediated recognition-protein priming and elevated anti-bacterial immune responses in Drosophila Malpighian tubule renal cells
Source: PubMed Central journal article supplement (PMC5984326; doi:10.1186/s12915-018-0532-5), 2018-05-31

Figure S5

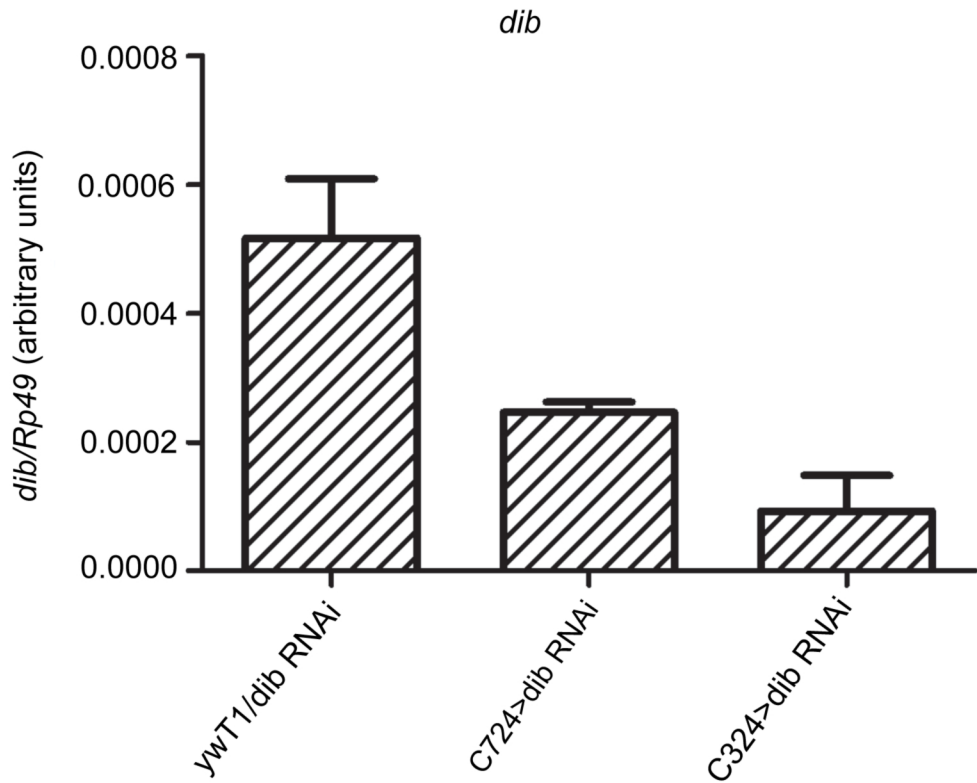

Supplement: 12915_2018_532_MOESM5_ESM.pdf [file 12915_2018_532_MOESM5_ESM.pdf]
