# Supplementary material for: Dehydration triggers ecdysone-mediated recognition-protein priming and elevated anti-bacterial immune responses in Drosophila Malpighian tubule renal cells
Source: PubMed Central journal article supplement (PMC5984326; doi:10.1186/s12915-018-0532-5), 2018-05-31
Supplement: 12915_2018_532_MOESM7_ESM.pdf [file 12915_2018_532_MOESM7_ESM.pdf]

Figure S7

A)

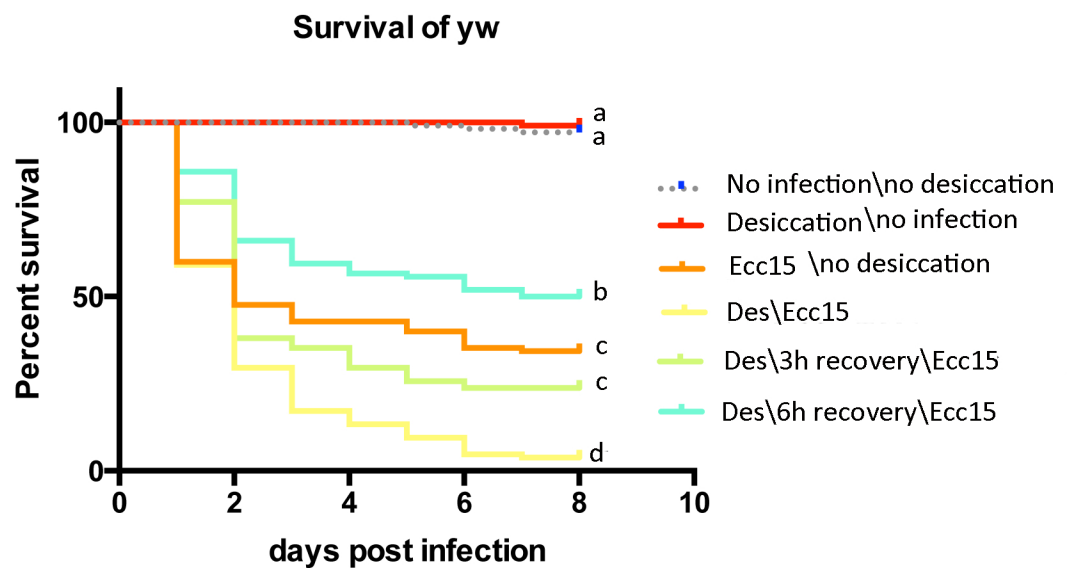

| Treatment comparison                                | p value  | Hazard ratio Ratio (and its reciprocal ) |
|-----------------------------------------------------|----------|------------------------------------------|
| <i>Ecc15</i> vs Des + <i>Ecc15</i>                  | p<0.0001 | 0.3939; 2.539                            |
| Des+ <i>Ecc15</i> vs Des + <i>Ecc15</i> 3h recovery | p<0.0001 | 2.156; 0.4639                            |
| Des+ <i>Ecc15</i> vs Des + <i>Ecc15</i> 6h recovery | p<0.0001 | 5.002; 0.1999                            |

B)

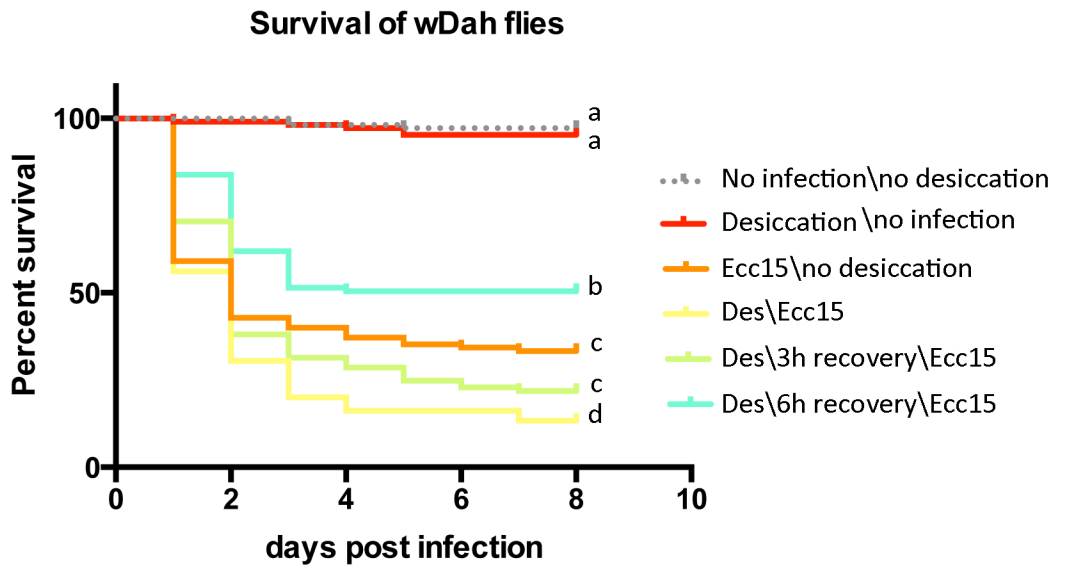

| Treatment comparison                                | p value  | Hazard ratio Ratio (and its reciprocal ) |
|-----------------------------------------------------|----------|------------------------------------------|
| <i>Ecc15</i> vs Des + <i>Ecc15</i>                  | p=0.0037 | 0.5635; 1.775                            |
| Des+ <i>Ecc15</i> vs Des + <i>Ecc15</i> 3h recovery | p=0.039  | 1.481; 0.6751                            |
| Des+ <i>Ecc15</i> vs Des + <i>Ecc15</i> 6h recovery | p<0.0001 | 3.435; 0.2911                            |
